# Supplementary material for: Revision and Postoperative Complication Rates of Conversion Total Hip Arthroplasty after Cephalomedullary Nailing of Intertrochanteric Femur Fractures: A Systematic Review and Meta-Analysis
Source: Research Square preprint supplement (doi:10.21203/rs.3.rs-7763642/v1), 2025-11-17
Supplement: Supplementary file 3 [file 99cb1be7e204637ad02ff89c.docx]

**Supplemental Table 2.** Newcastle-Ottawa Scale risk of bias assessment of included studies.

| **Author (Year)** | **Study Design** | **Level of Evidence** | **Selection** | | | | **Comparability** | **Outcome** | | | **Quality** |
| --- | --- | --- | --- | --- | --- | --- | --- | --- | --- | --- | --- |
| **Representativeness of exposed cohort (+)** | **Selection of nonexposed cohort (+)** | **Ascertainment of exposure (+)** | **Outcome not present before study (+)** | **Based on design and analysis (++)** | **Assessment of outcomes (+)** | **Follow-up length (+)** | **Adequacy of follow-up cohorts (+)** |  |
| Brunner (2016)30 | Retrospective Multicenter Cohort | Level III | **+** | **+** | **+** | **+** |  | **+** | **+** | **+** | 7/9 |
| Cardenas (2024)31 | Retrospective Multicenter Cohort | Level III | **+** | **+** | **+** | **+** | **+** | **+** | **+** | **+** | 8/9 |
| Gazzotti (2014)32 | Retrospective Case Series | Level IV | **+** | **+** | **+** | **+** |  | **+** | **+** | **+** | 7/9 |
| Godoy-Monzon (2020)33 | Retrospective Case Series | Level IV | **+** | **+** | **+** | **+** | **+** | **+** | **+** | **+** | 8/9 |
| Huang (2022)34 | Retrospective Cohort | Level III | **+** | **+** | **+** | **+** | **+** | **+** | **+** | **+** | 8/9 |
| Liu (2014)35 | Retrospective Case Series | Level IV |  | **+** | **+** | **+** |  | **+** | **+** | **+** | 6/9 |
| Mathur (2022)36 | Prospective Case Series | Level IV | **+** | **+** | **+** | **+** | **+** | **+** | **+** | **+** | 8/9 |
| Min (2019)37 | Prospective Cohort | Level III | **+** | **+** | **+** | **+** | **++** | **+** | **+** | **+** | 9/9 |
| Pui (2013)38 | Retrospective Multicenter Cohort | Level III | **+** | **+** | **+** | **+** | **+** | **+** | **+** | **+** | 8/9 |
| Schultz (2022)39 | Retrospective Cohort | Level III | **+** | **+** | **+** | **+** | **++** | **+** | **+** | **+** | 9/9 |
| Smith (2019)40 | Retrospective Cohort | Level III | **+** | **+** | **+** | **+** | **+** | **+** | **+** | **+** | 8/9 |
| Solarino (2013)41 | Retrospective Cohort | Level III | **+** | **+** | **+** | **+** |  | **+** | **+** | **+** | 7/9 |
| Soundarrajan (2024)42 | Retrospective Cohort | Level III | **+** | **+** | **+** | **+** |  | **+** | **+** | **+** | 7/9 |
| Yu (2020)43 | Retrospective Cohort | Level III | **+** | **+** | **+** | **+** | **+** | **+** | **+** | **+** | 8/9 |
| Yu (2016)44 | Retrospective Cohort | Level III | **+** | **+** | **+** | **+** | **+** | **+** | **+** | **+** | 8/9 |
| Zeng (2017)45 | Retrospective Cohort | Level III | **+** | **+** | **+** | **+** |  | **+** | **+** | **+** | 7/9 |
| Zhong (2021)46 | Retrospective Cohort | Level III | **+** | **+** | **+** | **+** |  | **+** | **+** | **+** | 7/9 |
