# Supplementary material for: Revision and Postoperative Complication Rates of Conversion Total Hip Arthroplasty after Cephalomedullary Nailing of Intertrochanteric Femur Fractures: A Systematic Review and Meta-Analysis
Source: Research Square preprint supplement (doi:10.21203/rs.3.rs-7763642/v1), 2025-11-17
Supplement: Supplementary file 4 [file da063e2d1785245397d68541.docx]

**Supplemental Table 3.** Intraoperative details and postoperative outcomes

| **Author (Year)** | **Number of cTHAs** | **Mean Operative Time, minutes (SD)** | **Mean LOS, days (SD)** | **Mean EBL, mL (SD)** | **Need for Transfusion, n (%)** | **Number of Transfused Units** | **Revision, n (%)** | **Infection, n (%)** | **Dislocation, n (%)** | **Subsidence, n (%)** | **PPF,**  **n (%)** | **Other Complications, n** |
| --- | --- | --- | --- | --- | --- | --- | --- | --- | --- | --- | --- | --- |
| Brunner (2016)30 | 27 | — | — | — | 0 (0.0) | — | 1 (3.7) | 0 (0.0) | 1 (3.7) | 0 (0.0) | 0 (0.0) | — |
| Cardenas (2024)31 | 45 | — | 3.77 (2.58) | 576.83 (366.59) | 0 (0.0) | — | 6 (13.3) | 4 (8.9) | 1 (2.2) | 0 (0.0) | 2 (4.4) | - Falls (n = 2) - Acute renal failure (n = 1) - Heterotopic ossification (n = 1) - IT band syndrome (n = 1) - Myocardial infarction (n = 1) - Potential metal allergy (n = 1) |
| Gazzotti (2014)32 | 10 | — | — | — | 7 (70.0) | 2, 3, or 4 units | 1 (10.0) | 0 (0.0) | 2 (20.0) | 0 (0.0) | 0 (0.0) | - Persistent thigh pain (n = 3) - Ipometria > 2 cm (n = 1) |
| Godoy-Monzon (2020)33 | 28 | — | — | — | — | — | 0 (0.0) | 1 (3.6) | 2 (7.2) | 0 (0.0) | 0 (0.0) | - Sympotomatic abductor deficiency (n = 1) |
| Huang (2022)34 | 244 | — | — | — | — | — | 11 (4.5) | 7 (2.9) | 4 (1.6) | 11 (4.5) | 10 (4.1) | - Insufferable hip pain (n = 7) - Lower limb shortening (n = 6) - Thrombotic events (n = 2) |
| Liu (2014)35 | 7 | — | — | — | 0 (0.0) | — | 0 (0.0) | 0 (0.0) | 0 (0.0) | 0 (0.0) | 0 (0.0) | — |
| Mathur (2022)36 | 15 | — | — | 461.3 (22.3) | 15 (100.0%) | 1 unit (n = 12), 2 units (n = 3) | 0 (0.0) | 1 (6.7) | 1 (6.7) | 0 (0.0) | 0 (0.0) | - Intraoperative hypotension (n = 1) |
| Min (2019)37 | 19 | — | — | — | — | — | 3 (15.8) | 0 (0.0) | 1 (5.3) | 0 (0.0) | 1 (5.3) | — |
| Pui (2013)38 | 31 | — | — | — | — | — | 0 (0.0) | 1 (3.2) | 2 (6.4) | 1 (3.2) | 3 (9.7) | - Urinary tract infection (n = 1) - Pulmonary embolism (n = 1) - GI bleed (n = 1) - Acute renal failure (n = 1) - Abductor tendon deficiency (n = 1) - Heterotopic ossification (n = 2) - Intraoperative nerve injury (n = 1) |
| Schultz (2022)39 | 22 | 176.3 (54.7) | 5.5 (2.9) | 600 (240) | — | — | 3 (13.6) | 2 (9.1) | 2 (9.1) | 0 (0.0) | 0 (0.0) | - Sepsis (n = 10) - Acute kidney injury (n = 1) - Urinary tract infection (n =1) - Anemia (n = 7) |
| Smith (2019)40 | 369 | — | 5.3 (3.5) | — | — | — | 24 (6.5) | 3 (0.8) | 9 (2.4) | 0 (0.0) | 0 (0.0) | - Care involving other specified rehabilitation procedure leading to revision (n=3) - Urinary tract infection (n=3) - Other mechanical complication of orthopaedic device, implant or graft (n=2) - Myasthenia gravis (n=1) - Atrial flutter (n=1) - SA node dysfunction (n=1) - Acute venous thromboembolism (n=1) - Bacterial pneumonia (n=1) |
| Solarino (2013)41 | 74 | 117 (76-192) | — | 585 (430-1720) | 43 (58.1%) | 3 or more units | 4 (5.4) | 3 (4.0) | 5 (6.8) | 0 (0.0) | 8 (10.8) | - Death due to pulmonary embolism (n = 2) - Ischemic myocardial infarction (n = 1) |
| Soundarrajan (2024)42 | 16 | — | — | — | — | — | 2 (12.5) | 0 (0.0) | 0 (0.0) | 0 (0.0) | 2 (12.5) | — |
| Yu (2020)43 | 198 | — | — | — | — | — | 14 (7.1) | 0 (0.0) | 6 (3.0) | 18 (9.1) | 13 (6.6) | - Unbearable hip pain (n = 7) |
| Yu (2016)44 | 70 | — | — | — | — | — | 0 (0.0) | 2 (2.9) | 4 (5.7) | 0 (0.0) | 5 (7.1) | - Urinary tract infection (n=2) - Pulmonary embolism (n=2) - Atrial fibrillation (n=2) - Acute renal failure (n=1) - Abductor tendon deficiency (n=2) - Heterotopic ossification (n=4) - Intraoperative nerve injury (n=1) |
| Zeng (2017)45 | 72 | — | — | — | — | — | 0 (0.0) | 2 (2.8) | 1 (1.4) | 0 (0.0) | 3 (4.2) | - Urinary tract infection (n=1) - Atrial fibrillation (n=2) - Prosthetic instability (n=1) - Limb length discrepancy (n=1) - Abductor tendon deficiency (n=2) - Heterotopic ossification (n=1) - Intraoperative nerve injury (n=1) |
| Zhong (2021)46 | 6 | — | — | 327.5 (81.7) | — | — | 0 (0.0) | 0 (0.0) | 1 (16.7) | 0 (0.0) | 0 (0.0) | — |

cTHA, conversion total hip arthroplasty; EBL, estimated blood loss; LOS, length of stay; PPF, periprosthetic fracture; SD: standard deviation
